# Supplementary material for: Middle-Upper Pleistocene climate changes shaped the divergence and demography of Cycas guizhouensis (Cycadaceae): Evidence from DNA sequences and microsatellite markers
Source: PubMed Central journal article supplement (PMC4895228; doi:10.1038/srep27368), 2016-06-07
Supplement: srep27368-s1.pdf [file srep27368-s1.pdf]

**Title:** Middle-Upper Pleistocene climate changes shaped the divergence and demography of *Cycas guizhouensis* (Cycadaceae): Evidence from DNA sequences and microsatellite markers

**Authors:** Xiuyan Feng, Ying Zheng & Xun Gong

**Table S1.** Details of sample locations, sample sizes (n) surveyed for DNA sequences and microsatellites of *C. guizhouensis*.

| Population Code | Population                | Latitude N° | Longitude E° | Altitude m | Individuals for DNA sequences/microsatellites |
|-----------------|---------------------------|-------------|--------------|------------|-----------------------------------------------|
| AL              | Anlong, Guizhou           | 24.965      | 105.261      | 500        | 10/20                                         |
| YP              | Yangping, Xingyi, Guizhou | 24.938      | 104.994      | 930        | 10/20                                         |
| LW              | Luowan, Xingyi, Guizhou   | 24.681      | 104.686      | 880        | 10/20                                         |
| LL              | Longlin, Guangxi          | 24.665      | 104.889      | 970        | 10/20                                         |
| XL              | Xilin, Guangxi            | 24.606      | 104.611      | 860        | 10/11                                         |
| SZ              | Shizong, Yunnan           | 24.652      | 104.248      | 1360       | 10/20                                         |
| LX              | Luxi, Yunnan              | 24.452      | 103.975      | 1160       | 10/20                                         |
| ML              | Mile, Yunnan              | 24.181      | 103.632      | 1430       | 10/20                                         |
| KY              | Kaiyuan, Yunnan           | 23.829      | 103.180      | 1400       | 10/20                                         |
| JS              | Jianshui, Yunnan          | 23.400      | 102.880      | 1320       | 10/18                                         |
| SP              | Shiping, Yunnan           | 23.720      | 102.500      | 1400       | 10/20                                         |
| Total           | 11                        |             |              |            | 110/209                                       |

**Table S2.** The composition of haplotypes, haplotype diversity (*Hd*) and nucleotide diversity (*Pi*) surveyed for combined cpDNA and nuclear genes of *C. guizhouensis*.

| Population code | cpDNA (10)                                      |           |                             | GTP (20)                                                  |           |                             | PHYP (20)                                                     |           |                             | F3H (20)                                                                        |           |                             |
|-----------------|-------------------------------------------------|-----------|-----------------------------|-----------------------------------------------------------|-----------|-----------------------------|---------------------------------------------------------------|-----------|-----------------------------|---------------------------------------------------------------------------------|-----------|-----------------------------|
|                 | Haplotypes (No.)                                | <i>Hd</i> | <i>Pi</i> × 10 <sup>3</sup> | Haplotypes(No.)                                           | <i>Hd</i> | <i>Pi</i> × 10 <sup>3</sup> | Haplotypes(No.)                                               | <i>Hd</i> | <i>Pi</i> × 10 <sup>3</sup> | Haplotypes(No.)                                                                 | <i>Hd</i> | <i>Pi</i> × 10 <sup>3</sup> |
| AL              | guiH1(10)                                       | 0         | 0                           | guiG1(20)                                                 | 0         | 0                           | guiP1(3) guiP2(17)                                            | 0.268     | 0.27                        | guiF1(12) F2(1) F3(1) F4(2) F5(1) F6(2) F7(1)                                   | 0.642     | 2.79                        |
| YP              | guiH1(10)                                       | 0         | 0                           | guiG1(20)                                                 | 0         | 0                           | guiP1(5) guiP2(15)                                            | 0.395     | 0.39                        | guiF1(2) F6(18)                                                                 | 0.189     | 0.75                        |
| LW              | guiH1(10)                                       | 0         | 0                           | guiG1(20)                                                 | 0         | 0                           | guiP1(5) guiP2(15)                                            | 0.395     | 0.39                        | guiF1(12) F4(2) F6(6)                                                           | 0.568     | 1.84                        |
| LL              | guiH1(10)                                       | 0         | 0                           | guiG1(16)<br>guiG2(4)                                     | 0.337     | 0.59                        | guiP1(8) guiP2(12)                                            | 0.505     | 0.50                        | guiF1(10) F4(3) F6(7)                                                           | 0.637     | 1.96                        |
| XL              | guiH1(2)<br>guiH2(5)<br>guiH3(1)<br>guiH4(2)    | 0.733     | 0.54                        | guiG1(19)<br>guiG3(1)                                     | 0.100     | 0.52                        | guiP1(9) guiP2(10)<br>guiP3(1)                                | 0.574     | 0.62                        | guiF1(8) F4(4) F6(1) F8(4) F9(1) F10(2)                                         | 0.784     | 5.68                        |
| SZ              | guiH2(6)<br>guiH5(4)                            | 0.533     | 0.18                        | guiG1(20)                                                 | 0         | 0                           | guiP1(18) guiP2(1)<br>guiP4(1)                                | 0.195     | 0.20                        | guiF4(1) F5(14) F6(3) F11(1) F12(1)                                             | 0.505     | 2.43                        |
| LX              | guiH6(8)<br>guiH7(2)                            | 0.356     | 0.36                        | guiG1(20)                                                 | 0         | 0                           | guiP1(19) guiP2(1)                                            | 0.100     | 0.10                        | guiF4(9) F5(1) F8(3) F13(3) F14(2) F15(2)                                       | 0.768     | 7.84                        |
| ML              | guiH4(10)                                       | 0         | 0                           | guiG1(20)                                                 | 0         | 0                           | guiP1(15) guiP2(3)<br>guiP4(2)                                | 0.426     | 0.46                        | guiF1(4) F2(1) F4(4) F5(1) F6(1) F8(1) F15(3) F16(3) F17(2)                     | 0.900     | 4.96                        |
| KY              | guiH8(8)<br>guiH9(2)                            | 0.356     | 0.24                        | guiG1(20)                                                 | 0         | 0                           | guiP1(11) guiP2(5)<br>guiP5(3) guiP6(1)                       | 0.642     | 0.76                        | guiF2(2) F4(2) F8(4) F18(5) F19(1) F20(4) F21(1) F22(1)                         | 0.874     | 6.99                        |
| JS              | guiH2(9)<br>guiH6(1)                            | 0.2       | 0.27                        | guiG1(20)                                                 | 0         | 0                           | guiP1(19) guiP4(1)                                            | 0.100     | 0.10                        | guiF1(2) F4(1) F5(12) F6(2) F23(2) F24(1)                                       | 0.637     | 3.29                        |
| SP              | guiH2(2)<br>guiH10(3)<br>guiH11(3)<br>guiH12(2) | 0.822     | 1.63                        | guiG1(11)<br>guiG4(1)<br>guiG5(6)<br>guiG6(1)<br>guiG7(1) | 0.632     | 2.44                        | guiP1(10) guiP2(3)<br>guiP7(2) guiP8(1)<br>guiP9(3) guiP10(1) | 0.726     | 1.05                        | guiF1(2) F2(1) F4(1) F5(3) F16(1) F17(1) F25(2) F26-F29(1) F30(3) F31(1) F32(1) | 0.958     | 6.06                        |
| Total           | 12                                              | 0.794     | 0.91                        | 7                                                         | 0.123     | 0.42                        | 10                                                            | 0.555     | 0.62                        | 32                                                                              | 0.870     | 4.93                        |

**Table S3.** Genetic diversity, differentiation parameters for the combined cpDNA sequences and nuclear genes in all populations of *C. guizhouensis*.

| Marker      | $H_s$ | $H_T$ | $G_{ST}$ | $N_{ST}$ |
|-------------|-------|-------|----------|----------|
| cpDNA       | 0.273 | 0.841 | 0.676    | 0.698    |
| <i>GTP</i>  | 0.097 | 0.125 | 0.223    | 0.241    |
| <i>PHYP</i> | 0.393 | 0.571 | 0.311    | 0.307    |
| <i>F3H</i>  | 0.678 | 0.902 | 0.248    | 0.192    |

**Table S4.** Parameters of neutrality tests and mismatch analyses based on cpDNA and nuclear genes of *C. guizhouensis*, note: \*\*,  $P < 0.01$ ; \*\*\*,  $P < 0.001$ .

| Marker      | Tajima' $D$ | Fu and Li' $D^*$ | Fu and Li' $F^*$ | Fu's $F_s$ | SSD     | raggedness |
|-------------|-------------|------------------|------------------|------------|---------|------------|
| cpDNA       | 0.74126     | 1.18632          | 1.22583          | 1.659      | 0.04352 | 0.23852    |
| <i>GTP</i>  | -1.67165    | -1.75178         | -2.05712         | -6.269**   | 0.00753 | 0.11759    |
| <i>PHYP</i> | -1.32224    | -2.07520         | -2.15827         | -5.505**   | 0.03506 | 0.30727    |
| <i>F3H</i>  | -0.19361    | 1.40253          | 0.90810          | -10.910*** | 0.07958 | 0.21545    |

**Table S5.** *P*-value of Hardy-Weinberg equilibrium tests for 11 populations of *C. guizhouensis*, note: -, Monomorphic; \*, *P* < 0.05; \*\*, *P* < 0.01; \*\*\*, *P* < 0.001.

| Population | Cha02               | Cha08               | Cy-TaiEST-SSR11     | E001                | E004                | Cpz26               | HL08                | CY232               | Cha-estssr01 | Cha-estssr02        | Cha-estssr04        | Cha-estssr03        | Cha05    | All loci |
|------------|---------------------|---------------------|---------------------|---------------------|---------------------|---------------------|---------------------|---------------------|--------------|---------------------|---------------------|---------------------|----------|----------|
| AL         | 0.002**             | 0.000***            | 1.000 <sup>ns</sup> | -                   | 1.000 <sup>ns</sup> | 0.544 <sup>ns</sup> | -                   | 0.129 <sup>ns</sup> | 0.000***     | -                   | 0.214 <sup>ns</sup> | 0.280 <sup>ns</sup> | -        | 0.000*** |
| YP         | 0.000***            | 0.000***            | 1.000 <sup>ns</sup> | -                   | 1.000 <sup>ns</sup> | 0.039*              | -                   | 0.002**             | 0.093        | -                   | 0.149 <sup>ns</sup> | 1.000 <sup>ns</sup> | -        | 0.000*** |
| LW         | 0.034*              | 0.000***            | 1.000 <sup>ns</sup> | 0.026*              | 0.800 <sup>ns</sup> | 0.009**             | -                   | 0.654 <sup>ns</sup> | 0.000***     | 1.000 <sup>ns</sup> | 1.000 <sup>ns</sup> | 0.647 <sup>ns</sup> | -        | 0.000*** |
| LL         | 0.017*              | 0.001**             | -                   | -                   | 1.000 <sup>ns</sup> | 0.182 <sup>ns</sup> | -                   | 1.000 <sup>ns</sup> | 0.000***     | 0.026*              | 1.000 <sup>ns</sup> | 0.528 <sup>ns</sup> | 0.026*   | 0.000*** |
| XL         | 0.173 <sup>ns</sup> | 0.022*              | -                   | -                   | 0.406 <sup>ns</sup> | 0.008**             | -                   | 0.143 <sup>ns</sup> | 0.000***     | 0.023*              | 1.000 <sup>ns</sup> | 0.215 <sup>ns</sup> | -        | 0.000*** |
| SZ         | 0.013*              | 0.000***            | -                   | 1.000 <sup>ns</sup> | 0.468 <sup>ns</sup> | 0.041*              | 1.000 <sup>ns</sup> | 0.004**             | 0.000***     | 1.000 <sup>ns</sup> | 1.000 <sup>ns</sup> | -                   | -        | 0.000*** |
| LX         | 0.035*              | 0.000***            | -                   | 0.003**             | 0.440 <sup>ns</sup> | 0.052 <sup>ns</sup> | 0.105 <sup>ns</sup> | 0.198 <sup>ns</sup> | 0.000***     | 0.000***            | 0.136 <sup>ns</sup> | -                   | -        | 0.000*** |
| ML         | 0.001**             | 0.224 <sup>ns</sup> | 0.633 <sup>ns</sup> | 0.012*              | 0.156 <sup>ns</sup> | 0.004**             | 1.000 <sup>ns</sup> | 0.339 <sup>ns</sup> | 0.000***     | 0.000***            | 0.018*              | -                   | -        | 0.000*** |
| KY         | 0.225 <sup>ns</sup> | 0.000***            | -                   | 1.000 <sup>ns</sup> | 0.076 <sup>ns</sup> | 0.284 <sup>ns</sup> | 1.000 <sup>ns</sup> | 0.032*              | 0.000***     | 0.000***            | 0.619 <sup>ns</sup> | 1.000 <sup>ns</sup> | -        | 0.000*** |
| JS         | 0.000***            | 0.001**             | 0.169 <sup>ns</sup> | 0.124 <sup>ns</sup> | 0.000***            | 0.371 <sup>ns</sup> | 1.000 <sup>ns</sup> | 0.004**             | 0.000***     | 0.267 <sup>ns</sup> | 0.036*              | -                   | -        | 0.000*** |
| SP         | 0.434 <sup>ns</sup> | 0.017*              | 0.041*              | 0.208 <sup>ns</sup> | 0.000***            | 0.656 <sup>ns</sup> | 1.000 <sup>ns</sup> | 0.054 <sup>ns</sup> | 0.000***     | 0.026*              | 1.000 <sup>ns</sup> | 0.544 <sup>ns</sup> | -        | 0.000*** |
| All pop.   | 0.000***            | 0.000***            | 0.541 <sup>ns</sup> | 0.001**             | 0.000***            | 0.000***            | 0.972 <sup>ns</sup> | 0.000***            | 0.000***     | 0.000***            | 0.233 <sup>ns</sup> | 0.832 <sup>ns</sup> | 0.000*** | 0.000*** |

**Table S6.** Estimates of gene flow ( $Nm$ ) between pairs of *C. guizhouensis* populations.

| Population | AL    | YP    | LW     | LL    | XL    | SZ    | LX     | ML    | KY    | JS    | SP    |
|------------|-------|-------|--------|-------|-------|-------|--------|-------|-------|-------|-------|
| AL         | 0.000 |       |        |       |       |       |        |       |       |       |       |
| YP         | 1.620 | 0.000 |        |       |       |       |        |       |       |       |       |
| LW         | 2.354 | 1.187 | 0.000  |       |       |       |        |       |       |       |       |
| LL         | 2.328 | 0.893 | 12.096 | 0.000 |       |       |        |       |       |       |       |
| XL         | 0.937 | 0.591 | 1.345  | 1.224 | 0.000 |       |        |       |       |       |       |
| SZ         | 1.758 | 0.833 | 1.150  | 1.052 | 0.786 | 0.000 |        |       |       |       |       |
| LX         | 2.176 | 1.048 | 1.755  | 1.321 | 1.464 | 6.716 | 0.000  |       |       |       |       |
| ML         | 1.124 | 0.805 | 1.046  | 0.824 | 1.578 | 1.675 | 4.050  | 0.000 |       |       |       |
| KY         | 1.638 | 0.965 | 1.785  | 1.537 | 2.163 | 2.534 | 4.966  | 4.250 | 0.000 |       |       |
| JS         | 1.676 | 0.956 | 1.532  | 1.245 | 1.484 | 2.578 | 13.486 | 2.746 | 3.955 | 0.000 |       |
| SP         | 1.143 | 0.910 | 1.532  | 1.038 | 1.986 | 1.335 | 3.740  | 4.478 | 3.895 | 3.043 | 0.000 |

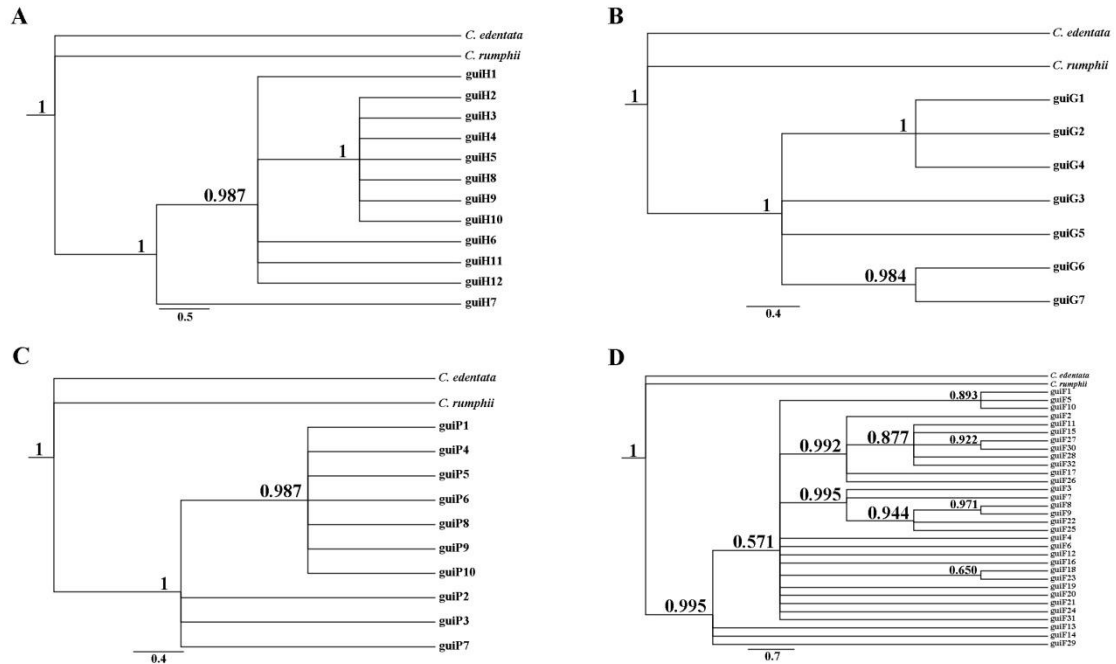

**Figure S1.** Bayesian tree based on the haplotypes of cpDNA (A), *GTP* (B), *PHYP* (C) and *F3H* (D). *Cycas edentata* and *Cycas rumphii* were used as outgroups. The number on each branch indicates the posterior probability (PP).

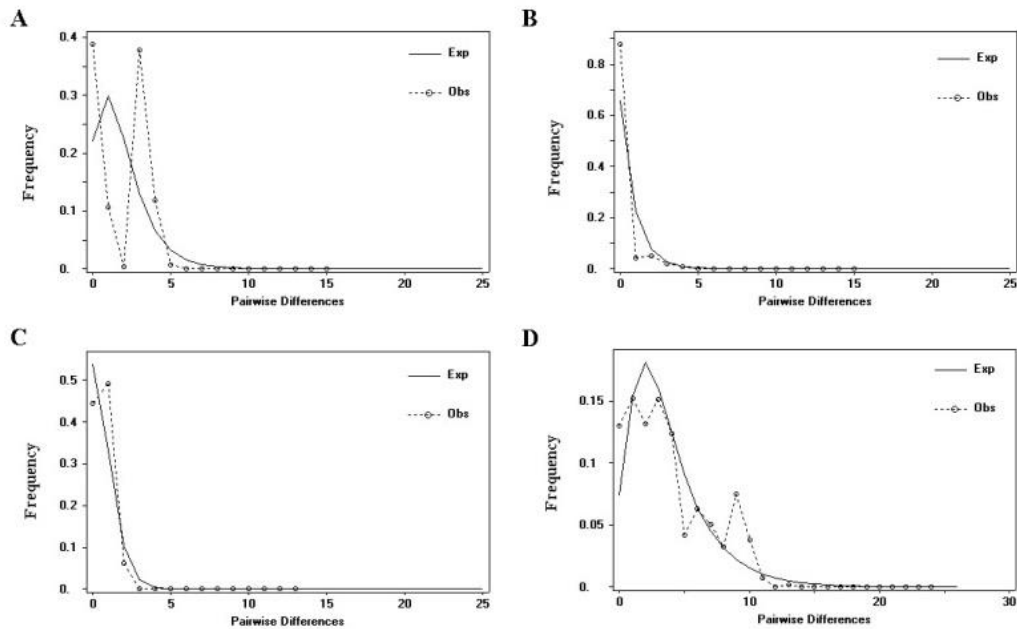

**Figure S2.** Mismatch distribution of cpDNA (A) and the nuclear genes *GTP* (B), *PHYP* (C) and *F3H* (D) haplotypes based on pairwise sequence differences against the frequency of occurrence for *C. guizhouensis*.

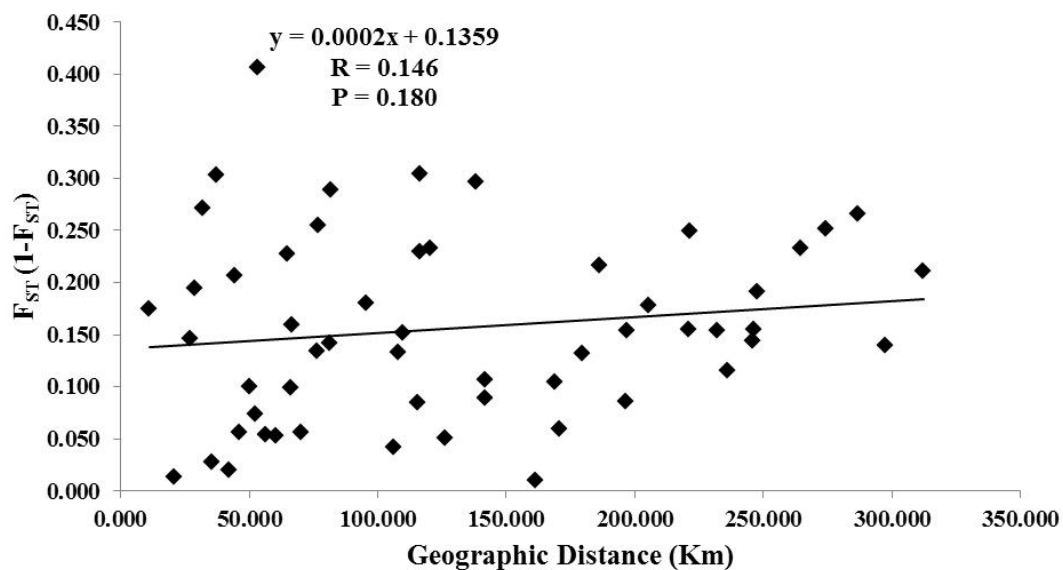

**Figure S3.** Figure plot of geographical distance against genetic distance for 11 populations of *C. guizhouensis*.

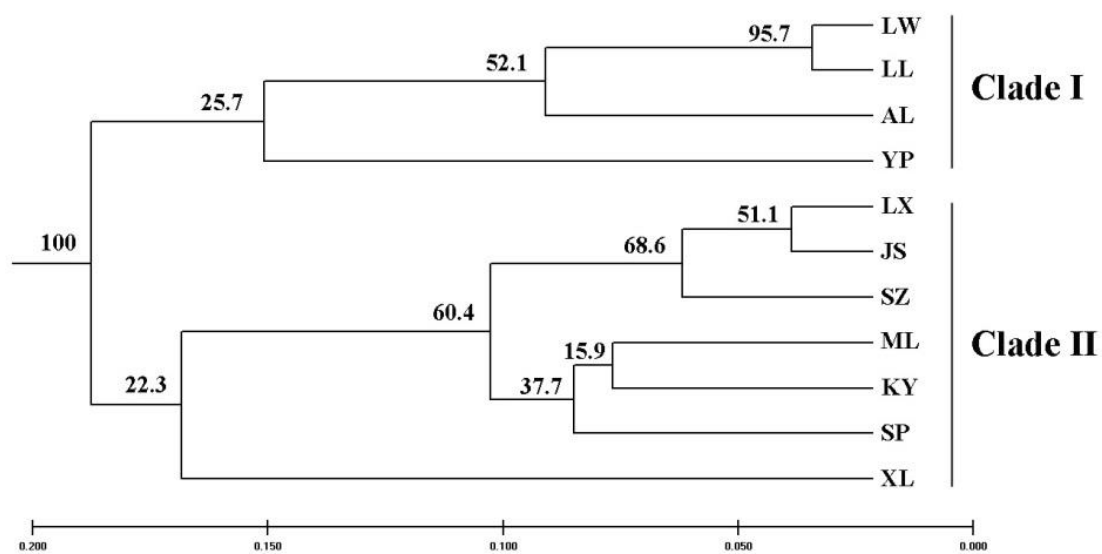

**Figure S4.** An unweighted pair-group method with arithmetic averages (UPGMA) phenogram of 11 populations of *C. guizhouensis* based on microsatellites. Numbers on branches indicate bootstrap values from 5,000 replicates.
